# Supplementary material for: High-resolution fluorescence-guided transcranial ultrasound mapping in the live mouse brain
Source: PubMed Central journal article supplement — Sci Adv. 2021 Dec 8;7(50):eabi5464. doi: 10.1126/sciadv.abi5464 (PMC8654306; doi:10.1126/sciadv.abi5464), 2021-12-08
Supplement: sciadv.abi5464_sm.pdf [file sciadv.abi5464_sm.pdf]

Supplementary Materials for  
**High-resolution fluorescence-guided transcranial ultrasound mapping in the  
live mouse brain**

Hector Estrada, Justine Robin, Ali Özbek, Zhenyue Chen, Anne Marowsky, Quanyu Zhou,  
Daniel Beck, Beau le Roy, Michael Arand, Shy Shoham\*, Daniel Razansky\*

\*Corresponding author. Email: [daniel.razansky@uzh.ch](mailto:daniel.razansky@uzh.ch) (D.R.); [shoham@nyu.edu](mailto:shoham@nyu.edu) (S.S.)

Published 8 December 2021, *Sci. Adv.* 7, eabi5464 (2021)  
DOI: 10.1126/sciadv.abi5464

**The PDF file includes:**

Figs. S1 to S6  
Legend for data S1

**Other Supplementary Material for this manuscript includes the following:**

Data S1

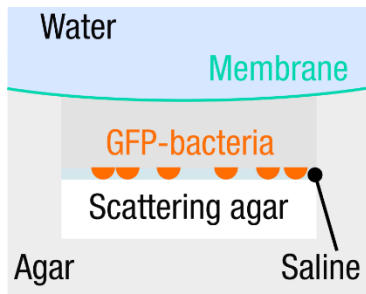

**Fig. S1. Experimental setup for simultaneous sonication and fluorescence imaging of GFP expressing bacteria.**

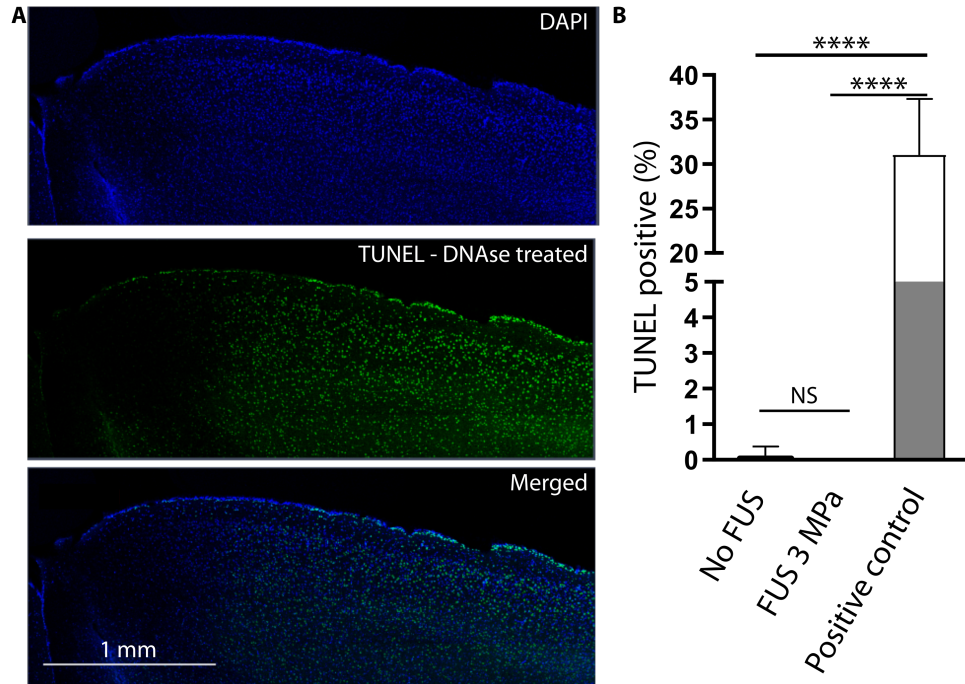

**Fig. S2. TUNEL staining validation and analysis of thermal injury for repetitive 3 MPa sonication.** (A) Positive control DNase treated cortex with TUNEL staining (green) and DAPI (blue). (B) Percentage of apoptotic cells is unchanged between untreated and 3MPa-stimulated mice. Comparison was performed by counting TUNEL-positive cells in the cortex of untreated age-matched C57BL/6 mice, in the treated cortical region of 3MPa-stimulated and in DNase-treated brain slices (positive control). TUNEL-positive cells were normalized to the total number of cells, stained with DAPI. (1-way ANOVA with Bonferroni post-hoc test.  $P < 0.0001$  \*\*\*\*).

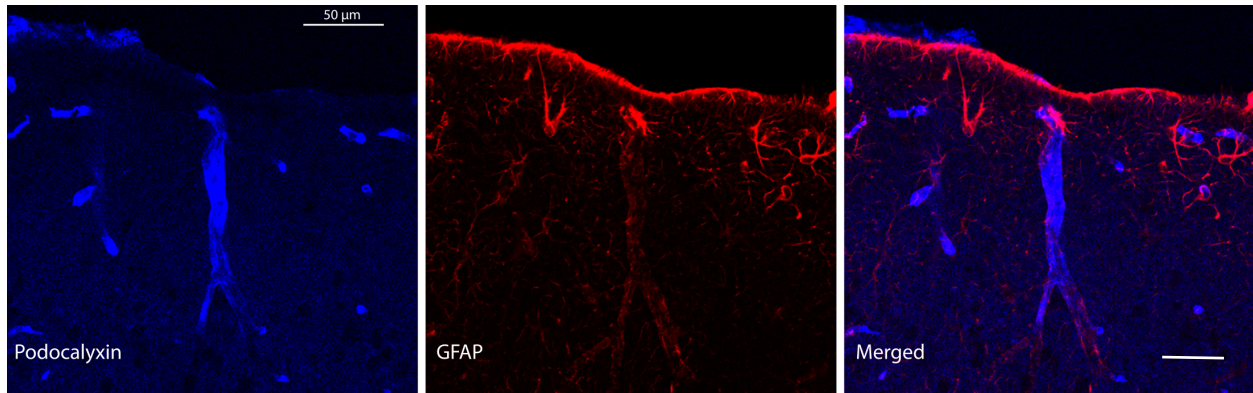

**Fig. S3. Vessels and astrocytes after single 3.9 MPa sonication.** Sonication with 3 MHz, 3.9 MPa over 100 ms generated astrocytic gliosis in an area of 100-200  $\mu\text{m}$  around the US focus. Astrocytes are immunolabeled with an anti-GFAP (glial fibrillary astrocytic protein) antibody, revealing the typical morphological changes (enlarged cell body and processes) of activated astrocytes. Podocalyxin labels vessels.

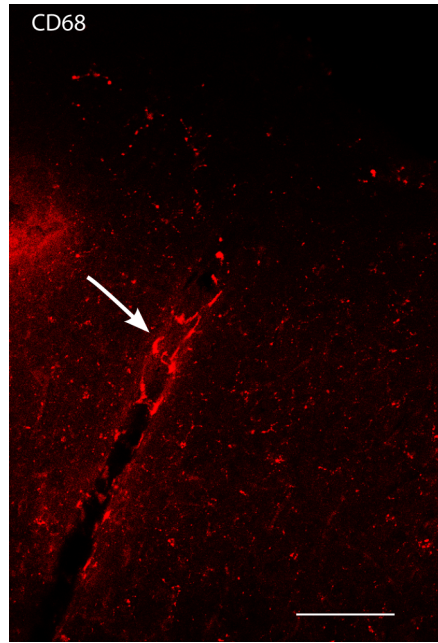

**Fig. S4. Microglia after single 3.9 MPa sonication.** Tissue sample sonicated with 3 MHz, 3.9 MPa over 100 ms was immunolabeled with CD68, which stains microglia. Enlarged microglia (white arrow) undergoing gliosis are seen in a vessel at the US focus, indicative of rupture of the blood brain barrier. Scale bar 100  $\mu\text{m}$ .

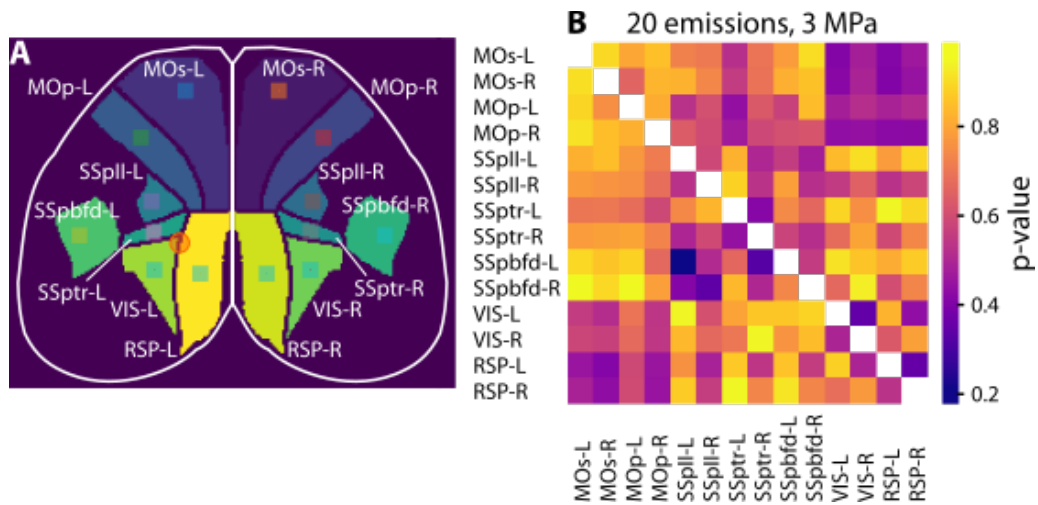

**Fig. S5. Functional connectivity for repetitive 3 MPa sonication.** (A) Schematic of the mouse brain. (B) Paired t-test of repeated 20 sonications using sequence 1 (3 MPa, 3 MHz, 150 ms continuous sonication) showing no significant changes from the baseline. Minimum  $p = 0.18$ . Experiment performed on 3 mice.

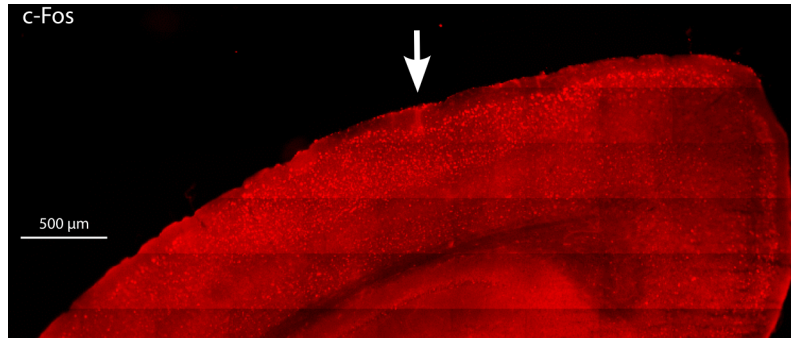

**Fig. S6. Lesion after single 4.5 MPa sonication.** Sonicating tissue sample with 3 MHz, 4.5 MPa over 150 ms resulted in a lesion in the upper cortical layer, evidenced by accumulation of IgGs (arrow). Strong c-Fos immunoreactivity, reflecting high cellular activity due to the lesion and, presumably, the ensuing cortical spreading depolarisation (CSD), can be observed across the entire cortex.

**Data S1. (separate file)**

Functional connectivity (z-score) calculated as described in the material and methods section. The file contains connectivity matrices before and after sonication with a single 100 ms, 3MHz, 3.9 MPa pulse (Sheet 1) and 150 ms, 3 MHz, 3 MPa pulse delivered 20 times (Sheet 2).
